# Supplementary material for: Miocene and Pliocene dominated diversification of the lichen-forming fungal genus Melanohalea (Parmeliaceae, Ascomycota) and Pleistocene population expansions
Source: PubMed Central journal article supplement (PMC3499221; doi:10.1186/1471-2148-12-176), 2012-09-11

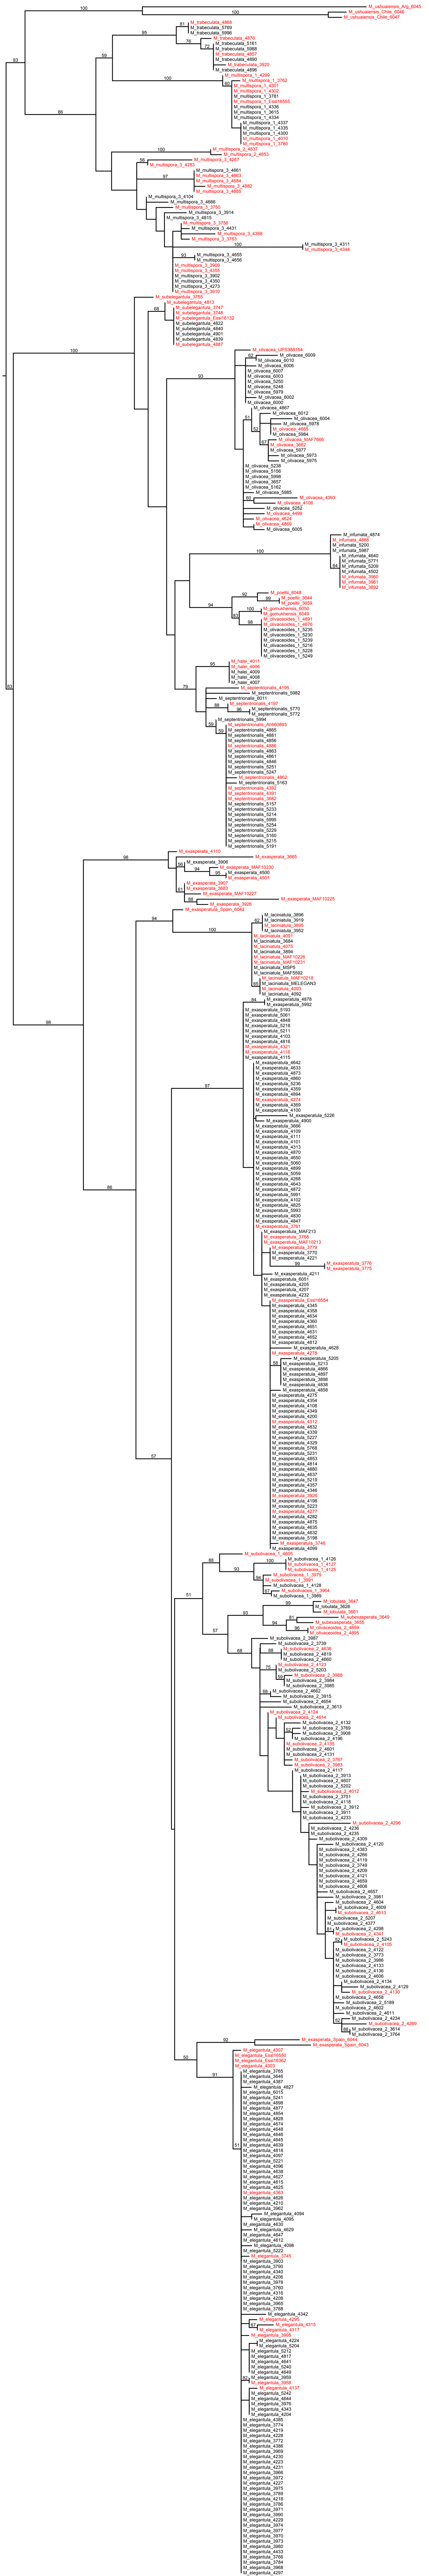

Supplement: 1471-2148-12-176-S2.pdf [file 1471-2148-12-176-S2.pdf]
